# Supplementary material for: Effect of aortic valve replacement on myocardial perfusion and exercise capacity in patients with severe aortic stenosis
Source: PubMed Central journal article supplement (PMC11401907; doi:10.1038/s41598-024-72480-2), 2024-09-14
Supplement: 41598_2024_72480_MOESM1_ESM.pdf [file 41598_2024_72480_MOESM1_ESM.pdf]

## Supplementary

**Table S1 - Baseline clinical characteristics, cardiac magnetic resonance and cardiopulmonary exercise parameters comparisons between patients in the overall cohort and those excluded in the main analysis**

|                              | Overall<br>(n= 68) | Excluded<br>(n= 18)          | p-value      |
|------------------------------|--------------------|------------------------------|--------------|
| Age (years)                  | 68 (63, 73)        | 70 (63, 74)                  | 0.636        |
| Male                         | 52 (77)            | 9 (50)                       | <b>0.028</b> |
| BSA (m <sup>2</sup> )        | 1.97 ± 0.21        | 1.94 ± 0.23                  | 0.572        |
| BMI (kg/m <sup>2</sup> )     | 29.2 ± 4.8         | 30.1 ± 5.4                   | 0.489        |
| HR (bpm)                     | 69 ± 13            | 70 ± 15                      | 0.753        |
| SBP (mmHg)                   | 134 ± 22           | 144 ± 23                     | 0.089        |
| DBP (mmHg)                   | 77 ± 9             | 78 ± 11                      | 0.574        |
| Hypertension                 | 43 (63)            | 11 (61)                      | 0.868        |
| Diabetes                     | 17 (25)            | 7 (39)                       | 0.243        |
| Dyslipidaemia                | 22 (32)            | 9 (50)                       | 0.166        |
| Coronary artery disease      | 10 (15)            | 3 (17)                       | 0.836        |
| Current/Ex-smoker            | 43 (63)            | 10 (56)                      | 0.551        |
| <b>Drug history</b>          |                    |                              |              |
| ACEi/ARB                     | 25 (37)            | 6 (33)                       | 0.787        |
| Beta-blocker                 | 28 (41)            | 8 (44)                       | 0.803        |
| Diuretic                     | 18 (27)            | 6 (33)                       | 0.564        |
| Statin                       | 46 (68)            | 15 (83)                      | 0.192        |
| <b>Bloods</b>                |                    |                              |              |
| Creatinine (umol/l)          | 83 (73, 97)        | 88 (80, 103)                 | 0.614        |
| NTproBNP (pmol/L)            | 208 (72, 510) *    | 251 (107, 1051) <sup>§</sup> | 0.619        |
| <b>NYHA functional class</b> |                    |                              | 0.803        |
| I                            | 9 (13)             | 2 (11)                       | -            |

|     |         |         |   |
|-----|---------|---------|---|
| II  | 45 (66) | 11 (61) | - |
| III | 14 (21) | 5 (28)  | - |

### Echocardiographic data

|                                         |             |             |       |
|-----------------------------------------|-------------|-------------|-------|
| AV Vmax (m/s)                           | 4.35 ± 0.62 | 4.29 ± 0.62 | 0.706 |
| MPG (mmHg)                              | 45.8 ± 14.3 | 44.2 ± 14.3 | 0.670 |
| AVAi (cm <sup>2</sup> /m <sup>2</sup> ) | 0.44 ± 0.12 | 0.42 ± 0.11 | 0.489 |

### Volumes, mass and function

|                                     |                   |                   |       |
|-------------------------------------|-------------------|-------------------|-------|
| LV EDVi (mL/m <sup>2</sup> )        | 82.0 ± 17.2       | 79.5 ± 20.2       | 0.600 |
| LV ESVi (mL/m <sup>2</sup> )        | 24.2 (19.1, 30.3) | 24.6 (17.3, 29.0) | 0.774 |
| LV SVi (mL/m <sup>2</sup> )         | 55.4 ± 12.3       | 52.2 ± 14.7       | 0.348 |
| LV EF (%)                           | 68.1 ± 9.0        | 66.9 ± 12.0       | 0.658 |
| LVMi (g/m <sup>2</sup> )            | 85.6 ± 19.7       | 84.6 ± 19.1       | 0.861 |
| LV mass: volume (g/mL)              | 1.06 ± 0.23       | 1.09 ± 0.25       | 0.569 |
| RV EDVi (mL/m <sup>2</sup> )        | 75.8 ± 15.3       | 75.8 ± 19.8       | 0.999 |
| RV ESVi (mL/m <sup>2</sup> )        | 29.0 ± 9.0        | 31.1 ± 12.2       | 0.401 |
| RV EF (%)                           | 62.0 ± 7.7        | 59.3 ± 9.3        | 0.222 |
| LA max indexed (mL/m <sup>2</sup> ) | 40.2 ± 12.3       | 39.3 ± 14.6       | 0.817 |

Values are mean ± SD, n (%) or median (interquartile range), **Bold** p values are statistically significant.  
Statistical tests: Comparisons were made using independent samples t-test, Mann-Whitney U- test or Chi-squared.

\*n= 41

§ = 7

ACEi, angiotensin converting enzyme- inhibitor; AV, aortic valve; AVAi, aortic valve area indexed to BSA, ARB, angiotensin II receptor blocker; BSA, body surface area; BMI, body mass index; EDVi, end diastolic volume indexed; ESVi, end systolic volume indexed; EF, ejection fraction; HR, heart rate; LA, left atrium; LV, left ventricle; LVMi, left ventricular mass indexed; MBF, myocardial blood flow; MPR, myocardial perfusion reserve; MPG, mean pressure gradient; NTproBNP, N terminal brain natriuretic peptide; NYHA, New York Heart failure Association; SBP/DBP, systolic/diastolic blood pressure; RV, right ventricle; SVi, stroke volume indexed; Vmax, peak velocity.

Table S2 - Differences in myocardial perfusion by quantification technique at baseline

|                       | Optimised dual<br>sequence | Model independent<br>deconvolution | p-value          |
|-----------------------|----------------------------|------------------------------------|------------------|
| Stress MBF (mL/min/g) | 1.21 ± 0.50                | 1.72 ± 0.45                        | <b>&lt;0.001</b> |
| Rest MBF (mL/min/g)   | 0.61 ± 0.15                | 0.86 ± 0.15                        | <b>&lt;0.001</b> |
| MPR                   | 2.01 ± 0.70                | 2.06 ± 0.51                        | 0.773            |

Values are mean ± SD, **Bold** p values are statistically significant.

Statistical test: Comparisons were made using independent samples t-test.

MBF, myocardial blood flow; MPR, myocardial perfusion reserve

Table S3 – Relationships between baseline aortic stenosis parameters and baseline stress myocardial blood flow

|         | Pearson Correlation coefficient |              |
|---------|---------------------------------|--------------|
|         | r (95% CI)                      | p-value      |
| AV Vmax | -0.35 (-0.58, -0.08)            | <b>0.012</b> |
| AV MPG  | -0.26 (-0.50, 0.02)             | 0.068        |
| AVAi    | 0.39 (0.13, 0.60)               | <b>0.005</b> |

**Bold** p values are statistically significant.

Statistical test: Pearson's correlation to investigate associations.

AV, aortic valve; AVAi, aortic valve area indexed to BSA; MPG, mean pressure gradient

**Table S4 – Relationships between baseline variables and baseline myocardial perfusion reserve**

|                            | Pearson's Correlation coefficient |                  |
|----------------------------|-----------------------------------|------------------|
|                            | r (95% CI)                        | p-value          |
| Age                        | -0.36 (-0.58, -0.09)              | <b>0.011</b>     |
| Sex                        | -0.17 (-0.43, 0.11)               | 0.239            |
| Hypertension               | -0.12 (-0.39, 0.16)               | 0.400            |
| Diabetes                   | -0.19 (-0.44, 0.10)               | 0.191            |
| Coronary artery disease    | -0.30 (-0.53, -0.02)              | <b>0.038</b>     |
| Log <sub>10</sub> NTproBNP | -0.43 (-0.67, -0.11)              | <b>0.011</b>     |
| AV Vmax                    | -0.45 (-0.65, -0.20)              | <b>0.001</b>     |
| AV MPG                     | -0.38 (-0.60, -0.11)              | <b>0.006</b>     |
| AVAi                       | 0.24 (-0.04, 0.48)                | 0.098            |
| LV EDVi                    | 0.05 (-0.24, 0.32)                | 0.749            |
| LV ESVi                    | -0.02 (-0.30, 0.26)               | 0.901            |
| LV SVi                     | 0.08 (-0.20, 0.35)                | 0.570            |
| LV EF                      | 0.06 (-0.22, 0.33)                | 0.687            |
| LVMi                       | -0.25 (-0.49, 0.03)               | 0.084            |
| LV mass: volume            | -0.27 (-0.51, 0.01)               | 0.062            |
| LGE                        | -0.40 (-0.61, -0.14)              | <b>0.004</b>     |
| Global longitudinal strain | -0.29 (-0.53, -0.001)             | <b>0.049</b>     |
| Stress MBF                 | 0.66 (0.46, 0.79)                 | <b>&lt;0.001</b> |
| Rest MBF                   | -0.21 (-0.46, 0.08)               | 0.147            |
| Peak VO <sub>2</sub>       | 0.42 (0.10, 0.67)                 | <b>0.013</b>     |

**Bold** p values are statistically significant.

Statistical test: Pearson's correlation to investigate associations.

AV, aortic valve; AVAi, aortic valve area indexed to BSA; EDVi, end diastolic volume indexed, ESVi, end systolic volume indexed; EF, ejection fraction; GLS, global longitudinal strain; LGE, late gadolinium enhancement; LV, left ventricle; LVMi, left ventricular mass indexed; MBF, myocardial blood flow; MPR, myocardial perfusion reserve; MPG, mean pressure gradient; NTproBNP, N-terminal pro-brain natriuretic peptide; SVi, stroke volume indexed.

**Table S5 - Cardiac magnetic resonance measured myocardial perfusion in patients with and without type II diabetes**

| <b>AS without T2D (n=40)</b> | <b>Pre-AVR</b> | <b>Post-AVR</b> | <b>% change</b> | <b>p-value</b>   |
|------------------------------|----------------|-----------------|-----------------|------------------|
| Stress MBF (mL/min/g)        | 1.59 ± 0.51    | 1.82 ± 0.62     | +15             | <b>&lt;0.001</b> |
| Rest MBF (mL/min/g)          | 0.78 ± 0.18    | 0.82 ± 0.37     | +6              | 0.370            |
| MPR                          | 2.10 ± 0.58    | 2.34 ± 0.67     | +11             | <b>0.024</b>     |
| <b>AS with T2D (n= 10)</b>   |                |                 |                 |                  |
| Stress MBF (mL/min/g)        | 1.44 ± 0.56    | 1.71 ± 0.65     | +19             | 0.244            |
| Rest MBF (mL/min/g)          | 0.79 ± 0.22    | 0.74 ± 0.12     | -7              | 0.286            |
| MPR                          | 1.83 ± 0.50    | 2.33 ± 0.76     | +27             | 0.099            |

Values are mean ± SD, n (%) or median (interquartile range), **Bold** p values are statistically significant.  
 Statistical test: Comparisons were made using paired sample t-test

T2D, type II diabetes; MBF, myocardial blood flow; MPR, myocardial perfusion reserve

**Table S6 - Relationships between baseline clinical, imaging and blood biomarkers with change in stress myocardial blood flow**

|                                  | Pearson's Correlation |                         | Multivariable associations |         |
|----------------------------------|-----------------------|-------------------------|----------------------------|---------|
|                                  | co-efficient          |                         |                            |         |
|                                  | r (95% CI)            | p-value                 | B (95% CI)                 | p-value |
| Age                              | -0.07 (-0.32,0.23)    | 0.640                   |                            |         |
| Sex                              | -0.06 (-0.33, 0.23)   | 0.694                   |                            |         |
| Hypertension                     | -0.07 (-0.34, 0.21)   | 0.636                   |                            |         |
| Diabetes                         | 0.11 (-0.17, 0.38)    | 0.447                   |                            |         |
| Coronary artery disease          | 0.18 (-0.10, 0.44)    | 0.200                   |                            |         |
| Log <sub>10</sub> NTproBNP       | 0.01 (-0.33, 0.35)    | 0.956                   |                            |         |
| AV Vmax                          | 0.18 (-0.11, 0.43)    | 0.221                   |                            |         |
| AV MPG                           | 0.14 (-0.14, 0.41)    | 0.318                   |                            |         |
| AVAi                             | -0.26 (-0.50, 0.02)   | 0.066                   | -58.0 (-131.0, 33.0)       | 0.236   |
| LV EDVi                          | 0.05 (-0.23, 0.33)    | 0.723                   |                            |         |
| LV ESVi                          | 0.07 (-0.21, 0.34)    | 0.634                   |                            |         |
| LV SVi                           | 0.01 (-0.27, 0.29)    | 0.924                   |                            |         |
| LV EF                            | -0.04 (-0.31, 0.24)   | 0.790                   |                            |         |
| LVMi                             | -0.14 (-0.40, 0.14)   | 0.328                   |                            |         |
| LV mass: volume                  | -0.22 (-0.47, 0.07)   | 0.130                   |                            |         |
| LA <sub>max</sub> volume indexed | -0.01 (-0.28, 0.27)   | 0.972                   |                            |         |
| LGE                              | 0.09 (-0.19, 0.36)    | 0.526                   |                            |         |
| Stress MBF                       | -0.28 (-0.52, -0.02)  | <b>0.049</b>            | -14.2 (-34.6, 6.15)        | 0.167   |
|                                  |                       | Adjusted R <sup>2</sup> | 0.068                      | 0.072   |

**Bold** p values are statistically significant.

Statistical tests: Pearson's correlation to investigate associations between baseline variables and change in stress MBF.

Multivariable linear regression to determine the associations with change in stress MBF

AV, aortic valve; AVAi, aortic valve area indexed to BSA; EDVi, end diastolic volume indexed, ESVi, end systolic volume indexed; EF, ejection fraction; GLS, global longitudinal strain; LA, left atrium; LGE, late gadolinium enhancement; LV, left ventricle; LVMi, left ventricular mass indexed; MBF, myocardial blood flow; MPR, myocardial perfusion reserve; MPG, mean pressure gradient; NTproBNP, N-terminal pro-brain natriuretic peptide; SVi, stroke volume indexed.
